# Supplementary material for: Adapterama II: universal amplicon sequencing on Illumina platforms (TaggiMatrix)
Source: PubMed Central journal article supplement (PMC6791344; doi:10.7717/peerj.7786), 2019-10-11

# Index Positions in TaggiMatrix Complete Library

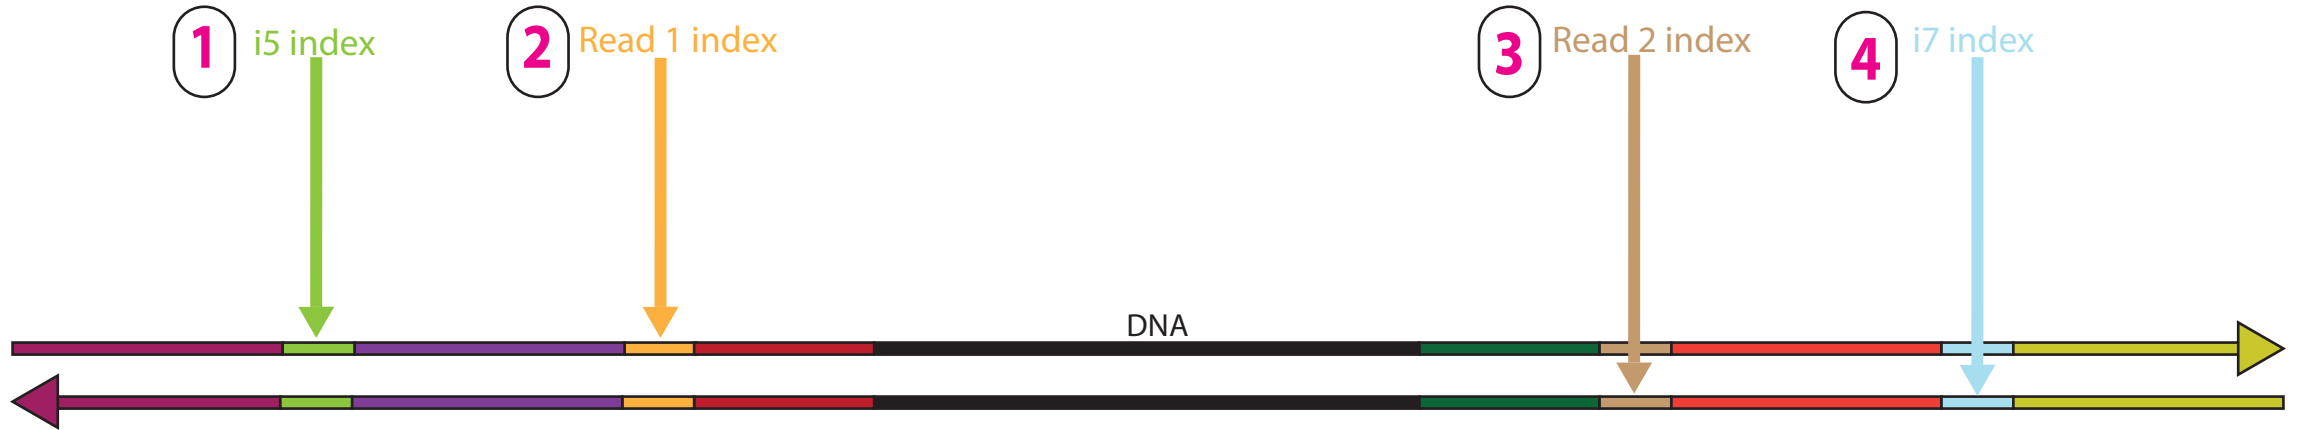

Supplement: peerj-07-7786-s001.pdf [file peerj-07-7786-s001.pdf]
